# Supplementary material
Source: Research Square preprint supplement (doi:10.21203/rs.3.rs-9121251/v1)
Supplement: Supplementary file 1 [file 70660ecb17c101580f4e2a80.docx]

**CAREGIVER BURDEN QUESTIONNAIRE- CHILDREN WITH CONGENITAL HEART DISEASE**

**SECTION A: DEMOGRAPHIC AND CLINICAL DATA**

1. AGE OF CHILD……………………..
2. SEX……………………………
3. PRIMARY CHD DIAGNOSIS……………………………
4. AGE AT DIAGNOSIS………………………….
5. HOW MANY HOSPITAL VISITS IN THE LAST 1 YEAR…………………………..
6. HOW MANY HOSPITAL ADMISSIONS SINCE DIAGNOSIS………………………..
7. AGE/ SEX OF CAREGIVER………………………….
8. OCCUPATION…………………………….
9. HIGHEST LEVEL OF EDUCATION……………………..
10. PRIMARYCAREGIVER: SAME AS RESPONDENT? YES/NO. IF NO, WHO?
11. HOW IS SPENT ON MEDICATIONS MONTHLY………………………..
12. SOURCE OF DRUGS/INVESTIGATIONS: OUT OF POCKET[ ] NHIS[ ]
13. RESISDENCE: WITHIN BENIN[ ] WITHIN EDO STATE[ ] OUTSIDE EDO[ ]

**SECTION B: CAREGIVER BURDEN ITEMS( SCORED)**

0= NEVER, RARELY=1, SOMETIMES=2, OFTEN=3, ALWAYS= 4

**Domain 1: Physical strain ( Items 1-5)**

1. I feel physically exhausted because of caring for my child
2. I have experiences sleep problems( difficulty falling asleep or waking frequently because of my child’s condition)
3. My own health problems have increased since becoming my child’s caregiver
4. I find it hard to carry out physical tasks( lifting, bathing, feeding) required for my child
5. I often feel I have no time for my personal medical appointments

**Domain 2- Emotional/psychological burden( Items 6-11)**

1. I feel emotionally overwhelmed by my child’s heart condition
2. I worry about my child’s future and life expectancy
3. I feel guilty( I could have done something differently to prevent the illness)
4. I feel anxious or depressed because of caregiving responsibilities
5. I have lost interest in activities I used to enjoy
6. I feel hopeful about my child’s health and progress

**Domain 3- Financial strain ( Items 12-15)**

1. The cost of my child’s care causes financial problems for my household
2. I have had to reduce work hours or stop working because of caregiving duties
3. I have borrowed money or used savings to pay for my child’s medical care
4. Paying for medications, transport and investigations is a significant burden

**Domain 4- Social and family Impact ( Items 16-19)**

1. My social life has been negatively affected by caregiving
2. My relationships with family or friends have been strained due to caregiving
3. I miss important family or community events because of my child’s care needs
4. I feel isolated or that others do not understand my situation

**Domain 5 – Time and Role interference (Items 20-23)**

1. I spend many hours each week providing care for my child
2. Caregiving interferes with my ability to work or study
3. I have less time to care for other family members due to my child’s needs
4. I find it difficult to manage household responsibilities

**Domain 6- Treatment management and healthcare navigations ( Items 24-27)**

1. I find it difficult to understand the medical information about my child’s condition
2. Arranging hospital visits and appointments is stressful and time consuming
3. Managing medications(schedule, doses) is challenging
4. I have difficulty accessing specialists, medication or equipment that my child needs

**Domain 7- Uncertainty and future concerns( Items 28-30)**

1. I worry about the possibility of my child having major complications in future
2. I worry about who will care for my child if something happens to me
3. I feel unprepared to cope with sudden deterioration or emergency

INTERPRETATION

- 0-24 : Minimal Burden
- 25-49: Mild Burden
- 50-74: Moderate Burden
- 75-120: Severe Burden
